# Supplementary material for: Construction and analysis of mRNA, miRNA, lncRNA, and TF regulatory networks reveal the key genes associated with prostate cancer
Source: PLoS One. 2018 Aug 23;13(8):e0198055. doi: 10.1371/journal.pone.0198055 (PMC6107126; doi:10.1371/journal.pone.0198055)
Supplement: S1 File — (XLSX) [file pone.0198055.s006.xlsx]

## Sheet: KEGG
Category	Term	Count	GeneRatio	PValue	Genes	List Total	Pop Hits	Pop Total	Fold Enrichment	Bonferroni	Benjamini	FDR
KEGG_PATHWAY	hsa04068:FoxO signaling pathway	9	0.0370325	4.04181e-05	EGFR, IRS2, TGFBR1, SOS2, FBXO32, PTEN, PIK3R1, BCL2L11, TGFB2	68	134	6910	6.82507	0.00668708	0.00668708	0.0491001
KEGG_PATHWAY	hsa04510:Focal adhesion	10	0.0411472	0.00014901	EGFR, FLT1, ITGB8, DIAPH1, VEGFA, SOS2, RELN, PTEN, PIK3R1, COL4A6	68	206	6910	4.9329	0.024434	0.0122925	0.180908
KEGG_PATHWAY	hsa04066:HIF-1 signaling pathway	7	0.028803	0.00034644	EGFR, FLT1, TFRC, VEGFA, CAMK2D, IL6R, PIK3R1	68	98	6910	7.2584	0.0558961	0.0189904	0.42014
KEGG_PATHWAY	hsa04151:PI3K-Akt signaling pathway	12	0.0493766	0.000424124	EGFR, FLT1, ITGB8, VEGFA, SOS2, RELN, IL6R, KIT, PTEN, PIK3R1, BCL2L11, COL4A6	68	345	6910	3.53453	0.0679973	0.0174508	0.514127
KEGG_PATHWAY	hsa05213:Endometrial cancer	5	0.0205736	0.0015407	EGFR, SOS2, PTEN, TCF7L1, PIK3R1	68	52	6910	9.77093	0.225822	0.0499025	1.85607
KEGG_PATHWAY	hsa05205:Proteoglycans in cancer	8	0.0329177	0.00306199	EGFR, VEGFA, SOS2, CAMK2D, FAS, PIK3R1, HOXD10, TGFB2	68	200	6910	4.06471	0.398946	0.0813453	3.65769
KEGG_PATHWAY	hsa04144:Endocytosis	9	0.0370325	0.00327696	EGFR, FLT1, TFRC, LDLR, TGFBR1, PSD3, CYTH3, KIT, TGFB2	68	258	6910	3.5448	0.420082	0.0748861	3.90982
KEGG_PATHWAY	hsa05214:Glioma	5	0.0205736	0.00350676	EGFR, SOS2, CAMK2D, PTEN, PIK3R1	68	65	6910	7.81674	0.441859	0.0702998	4.17865
KEGG_PATHWAY	hsa05212:Pancreatic cancer	5	0.0205736	0.00350676	EGFR, TGFBR1, VEGFA, PIK3R1, TGFB2	68	65	6910	7.81674	0.441859	0.0702998	4.17865
KEGG_PATHWAY	hsa05200:Pathways in cancer	11	0.0452619	0.00425273	EGFR, TGFBR1, VEGFA, SOS2, FAS, KIT, PTEN, TCF7L1, PIK3R1, COL4A6, TGFB2	68	393	6910	2.84426	0.507105	0.0755965	5.04663
KEGG_PATHWAY	hsa04060:Cytokine-cytokine receptor interaction	8	0.0329177	0.00657467	EGFR, FLT1, TGFBR1, VEGFA, FAS, IL6R, KIT, TGFB2	68	230	6910	3.53453	0.66546	0.103718	7.70232
KEGG_PATHWAY	hsa05160:Hepatitis C	6	0.0246883	0.00911537	EGFR, OCLN, LDLR, SOS2, IRF1, PIK3R1	68	133	6910	4.58425	0.781308	0.129067	10.53
KEGG_PATHWAY	hsa04012:ErbB signaling pathway	5	0.0205736	0.00983703	EGFR, SOS2, CAMK2D, NRG1, PIK3R1	68	87	6910	5.84009	0.80622	0.127814	11.3185
KEGG_PATHWAY	hsa05215:Prostate cancer	5	0.0205736	0.0102316	EGFR, SOS2, PTEN, TCF7L1, PIK3R1	68	88	6910	5.77373	0.818625	0.123065	11.747
KEGG_PATHWAY	hsa05221:Acute myeloid leukemia	4	0.0164589	0.0167533	SOS2, KIT, TCF7L1, PIK3R1	68	56	6910	7.2584	0.939469	0.181539	18.5589
KEGG_PATHWAY	hsa05206:MicroRNAs in cancer	8	0.0329177	0.0197813	EGFR, IRS2, VEGFA, SOS2, PTEN, BCL2L11, HOXD10, TGFB2	68	285	6910	2.85243	0.963725	0.19837	21.5546
KEGG_PATHWAY	hsa05210:Colorectal cancer	4	0.0164589	0.0219401	TGFBR1, TCF7L1, PIK3R1, TGFB2	68	62	6910	6.55598	0.974843	0.205596	23.6283
KEGG_PATHWAY	hsa05230:Central carbon metabolism in cancer	4	0.0164589	0.0238429	EGFR, KIT, PTEN, PIK3R1	68	64	6910	6.3511	0.981791	0.209934	25.4141
KEGG_PATHWAY	hsa05211:Renal cell carcinoma	4	0.0164589	0.0248269	VEGFA, SOS2, PIK3R1, TGFB2	68	65	6910	6.25339	0.984598	0.206934	26.3226
KEGG_PATHWAY	hsa05220:Chronic myeloid leukemia	4	0.0164589	0.0323225	TGFBR1, SOS2, PIK3R1, TGFB2	68	72	6910	5.64542	0.995722	0.249534	32.9164
KEGG_PATHWAY	hsa05161:Hepatitis B	5	0.0205736	0.0515978	TGFBR1, FAS, PTEN, PIK3R1, TGFB2	68	145	6910	3.50406	0.999848	0.355774	47.4659
KEGG_PATHWAY	hsa04512:ECM-receptor interaction	4	0.0164589	0.0519	ITGB8, SV2B, RELN, COL4A6	68	87	6910	4.67208	0.999856	0.343798	47.6689
KEGG_PATHWAY	hsa04540:Gap junction	4	0.0164589	0.0533707	EGFR, SOS2, GUCY1A3, GJA1	68	88	6910	4.61898	0.999889	0.3389	48.6468
KEGG_PATHWAY	hsa04390:Hippo signaling pathway	5	0.0205736	0.0582575	FRMD6, TGFBR1, DLG4, TCF7L1, TGFB2	68	151	6910	3.36482	0.999953	0.351577	51.7769
KEGG_PATHWAY	hsa04932:Non-alcoholic fatty liver disease (NAFLD)	5	0.0205736	0.0582575	IRS2, FAS, IL6R, PIK3R1, BCL2L11	68	151	6910	3.36482	0.999953	0.351577	51.7769
KEGG_PATHWAY	hsa04921:Oxytocin signaling pathway	5	0.0205736	0.0665851	EGFR, CAMK2D, GUCY1A3, KCNJ2, PIK3R1	68	158	6910	3.21575	0.999989	0.379107	56.7103
KEGG_PATHWAY	hsa04014:Ras signaling pathway	6	0.0246883	0.0673779	EGFR, FLT1, VEGFA, SOS2, KIT, PIK3R1	68	226	6910	2.69781	0.999991	0.370717	57.1549
KEGG_PATHWAY	hsa05142:Chagas disease (American trypanosomiasis)	4	0.0164589	0.0795421	TGFBR1, FAS, PIK3R1, TGFB2	68	104	6910	3.90837	0.999999	0.410914	63.4725
KEGG_PATHWAY	hsa04931:Insulin resistance	4	0.0164589	0.086821	IRS2, PTEN, PPARGC1A, PIK3R1	68	108	6910	3.76362	1	0.427874	66.8317

## Sheet: BP
Category	Term	Count	GeneRatio	PValue	Genes	List Total	Pop Hits	Pop Total	Fold Enrichment	Bonferroni	Benjamini	FDR
GOTERM_BP_DIRECT	GO:0030335~positive regulation of cell migration	10	0.0411472	1.68538e-05	EGFR, IRS2, GCNT2, FLT1, SEMA6D, DIAPH1, TGFBR1, VEGFA, KIT, PIK3R1	135	184	16792	6.76006	0.0213916	0.0213916	0.0274703
GOTERM_BP_DIRECT	GO:0014066~regulation of phosphatidylinositol 3-kinase signaling	6	0.0246883	0.000397518	EGFR, IRS2, ENTPD5, KIT, NRG1, PIK3R1	135	78	16792	9.56809	0.399575	0.225129	0.646036
GOTERM_BP_DIRECT	GO:0045944~positive regulation of transcription from RNA polymerase II promoter	19	0.0781796	0.000800399	EGFR, HLF, MYO6, ELF4, CDK9, NR3C1, RORA, LPIN1, PPARGC1A, HOXD10, MLLT10, TRPS1, HEYL, VEGFA, PSIP1, IRF1, NRG1, ETV5, PIK3R1	135	981	16792	2.40909	0.642036	0.289965	1.29679
GOTERM_BP_DIRECT	GO:0010628~positive regulation of gene expression	9	0.0370325	0.00121198	LDLR, ITGB8, TGFBR1, VEGFA, GJA1, QKI, KIT, EPB41L4B, TGFB2	135	262	16792	4.27277	0.789004	0.322251	1.95746
GOTERM_BP_DIRECT	GO:0043406~positive regulation of MAP kinase activity	5	0.0205736	0.00125638	EGFR, FLT1, TENM1, VEGFA, KIT	135	59	16792	10.5411	0.8007	0.275729	2.02848
GOTERM_BP_DIRECT	GO:0008284~positive regulation of cell proliferation	12	0.0493766	0.00128237	EGFR, IRS2, GCNT2, FLT1, TGFBR1, VEGFA, IL6R, KIT, BAMBI, NRG1, PTEN, TGFB2	135	466	16792	3.20305	0.807245	0.239964	2.07003
GOTERM_BP_DIRECT	GO:0048015~phosphatidylinositol-mediated signaling	6	0.0246883	0.00159771	EGFR, IRS2, KIT, NRG1, PTEN, PIK3R1	135	106	16792	7.04067	0.871458	0.254031	2.57286
GOTERM_BP_DIRECT	GO:0014068~positive regulation of phosphatidylinositol 3-kinase signaling	5	0.0205736	0.00180143	FLT1, RELN, KIT, NRG1, TGFB2	135	65	16792	9.56809	0.901068	0.251111	2.89642
GOTERM_BP_DIRECT	GO:0010718~positive regulation of epithelial to mesenchymal transition	4	0.0164589	0.0022756	GCNT2, TGFBR1, BAMBI, TGFB2	135	33	16792	15.077	0.946224	0.277306	3.64561
GOTERM_BP_DIRECT	GO:0071260~cellular response to mechanical stimulus	5	0.0205736	0.00249198	EGFR, IRF1, GJA1, FAS, KCNJ2	135	71	16792	8.75952	0.959286	0.273938	3.98569
GOTERM_BP_DIRECT	GO:0042060~wound healing	5	0.0205736	0.00383912	EGFR, TGFBR1, EPB41L4B, NRG1, TGFB2	135	80	16792	7.77407	0.99281	0.361506	6.07774
GOTERM_BP_DIRECT	GO:0051897~positive regulation of protein kinase B signaling	5	0.0205736	0.00457067	EGFR, GCNT2, TGFBR1, NRG1, HIP1	135	84	16792	7.40388	0.997199	0.387252	7.1958
GOTERM_BP_DIRECT	GO:0030307~positive regulation of cell growth	5	0.0205736	0.00457067	EGFR, TGFBR1, ACSL4, NRG1, TGFB2	135	84	16792	7.40388	0.997199	0.387252	7.1958
GOTERM_BP_DIRECT	GO:0060317~cardiac epithelial to mesenchymal transition	3	0.0123442	0.0046542	TGFBR1, HEYL, TGFB2	135	13	16792	28.7043	0.997484	0.368973	7.32266
GOTERM_BP_DIRECT	GO:0045785~positive regulation of cell adhesion	4	0.0164589	0.0048573	VEGFA, CYTH3, EPB41L4B, NRG1	135	43	16792	11.5707	0.998064	0.359958	7.63045
GOTERM_BP_DIRECT	GO:0001822~kidney development	5	0.0205736	0.00496935	TGFBR1, VEGFA, SULF1, BCL2L11, TGFB2	135	86	16792	7.2317	0.998324	0.346952	7.79985
GOTERM_BP_DIRECT	GO:2000310~regulation of N-methyl-D-aspartate selective glutamate receptor activity	3	0.0123442	0.00620023	DLG4, RELN, PPARGC1A	135	15	16792	24.877	0.999658	0.392698	9.64158
GOTERM_BP_DIRECT	GO:0032793~positive regulation of CREB transcription factor activity	3	0.0123442	0.00620023	EPHA5, VEGFA, RELN	135	15	16792	24.877	0.999658	0.392698	9.64158
GOTERM_BP_DIRECT	GO:0007179~transforming growth factor beta receptor signaling pathway	5	0.0205736	0.00630386	GCNT2, TGFBR1, SKIL, BAMBI, TGFB2	135	92	16792	6.76006	0.999701	0.37952	9.79505
GOTERM_BP_DIRECT	GO:0046854~phosphatidylinositol phosphorylation	5	0.0205736	0.00679668	EGFR, IRS2, KIT, NRG1, PIK3R1	135	94	16792	6.61623	0.999842	0.384984	10.5215
GOTERM_BP_DIRECT	GO:0003222~ventricular trabecula myocardium morphogenesis	3	0.0123442	0.00704914	TGFBR1, NRG1, TGFB2	135	16	16792	23.3222	0.999886	0.379784	10.8916
GOTERM_BP_DIRECT	GO:0018108~peptidyl-tyrosine phosphorylation	6	0.0246883	0.00766763	EPHA5, EGFR, FLT1, RELN, KIT, NRG1	135	153	16792	4.87785	0.999949	0.389681	11.7921
GOTERM_BP_DIRECT	GO:0048663~neuron fate commitment	3	0.0123442	0.00794752	TGFBR1, NRG1, TGFB2	135	17	16792	21.9503	0.999964	0.385837	12.1968
GOTERM_BP_DIRECT	GO:0010880~regulation of release of sequestered calcium ion into cytosol by sarcoplasmic reticulum	3	0.0123442	0.00889453	CAMK2D, PDE4D, ASPH	135	18	16792	20.7309	0.999989	0.406094	13.5531
GOTERM_BP_DIRECT	GO:0007411~axon guidance	6	0.0246883	0.00897294	EPHA5, ROBO1, NTN4, RELN, B3GNT2, TGFB2	135	159	16792	4.69378	0.999991	0.395161	13.6646
GOTERM_BP_DIRECT	GO:0060314~regulation of ryanodine-sensitive calcium-release channel activity	3	0.0123442	0.00988936	CAMK2D, PDE4D, ASPH	135	19	16792	19.6398	0.999997	0.41216	14.9568
GOTERM_BP_DIRECT	GO:2000463~positive regulation of excitatory postsynaptic potential	3	0.0123442	0.0109312	DLG4, RELN, PTEN	135	20	16792	18.6578	0.999999	0.431115	16.4039
GOTERM_BP_DIRECT	GO:0030879~mammary gland development	3	0.0123442	0.0120192	IRS2, NRG1, BCL2L11	135	21	16792	17.7693	1	0.449372	17.8904
GOTERM_BP_DIRECT	GO:0048661~positive regulation of smooth muscle cell proliferation	4	0.0164589	0.0122107	EGFR, CAMK2D, IL6R, PPARGC1A	135	60	16792	8.29235	1	0.442229	18.1494
GOTERM_BP_DIRECT	GO:0030512~negative regulation of transforming growth factor beta receptor signaling pathway	4	0.0164589	0.0145292	TGFBR1, CHST11, SKIL, BAMBI	135	64	16792	7.77407	1	0.488616	21.2256
GOTERM_BP_DIRECT	GO:0043547~positive regulation of GTPase activity	11	0.0452619	0.0151545	EGFR, IRS2, ARHGEF38, SOS2, DLG4, PSD3, CAMK2D, CYTH3, KIT, NRG1, FARP1	135	565	16792	2.42166	1	0.491143	22.0364
GOTERM_BP_DIRECT	GO:0007507~heart development	6	0.0246883	0.015727	ROBO1, TGFBR1, TRPS1, GJA1, PTEN, TGFB2	135	183	16792	4.0782	1	0.492337	22.7719
GOTERM_BP_DIRECT	GO:2001235~positive regulation of apoptotic signaling pathway	3	0.0123442	0.0168177	TGFBR1, PTEN, TP53INP1	135	25	16792	14.9262	1	0.504385	24.1551
GOTERM_BP_DIRECT	GO:0000165~MAPK cascade	7	0.028803	0.0186696	EGFR, IRS2, DLG4, CAMK2D, PPM1L, KIT, NRG1	135	262	16792	3.32327	1	0.530275	26.4506
GOTERM_BP_DIRECT	GO:0048010~vascular endothelial growth factor receptor signaling pathway	4	0.0164589	0.0198659	FLT1, VEGFA, SULF1, PIK3R1	135	72	16792	6.91029	1	0.541657	27.8987
GOTERM_BP_DIRECT	GO:2000145~regulation of cell motility	3	0.0123442	0.0208638	EGFR, DIAPH1, NRG1	135	28	16792	13.327	1	0.548703	29.086
GOTERM_BP_DIRECT	GO:0060412~ventricular septum morphogenesis	3	0.0123442	0.0222937	TGFBR1, HEYL, TGFB2	135	29	16792	12.8674	1	0.562409	30.7555
GOTERM_BP_DIRECT	GO:0001937~negative regulation of endothelial cell proliferation	3	0.0123442	0.0222937	TGFBR1, SULF1, GJA1	135	29	16792	12.8674	1	0.562409	30.7555
GOTERM_BP_DIRECT	GO:0045893~positive regulation of transcription, DNA-templated	10	0.0411472	0.0223483	ELF4, TGFBR1, IRF1, ZNF711, RORA, ASPH, BAMBI, TRERF1, PPARGC1A, TP53INP1	135	515	16792	2.41525	1	0.553137	30.8185
GOTERM_BP_DIRECT	GO:0060021~palate development	4	0.0164589	0.0228873	FRAS1, BNC2, TGFBR1, TGFB2	135	76	16792	6.54659	1	0.551952	31.4376
GOTERM_BP_DIRECT	GO:0030324~lung development	4	0.0164589	0.0228873	EGFR, CRISPLD2, VEGFA, SIM2	135	76	16792	6.54659	1	0.551952	31.4376
GOTERM_BP_DIRECT	GO:0010629~negative regulation of gene expression	5	0.0205736	0.0241275	LDLR, ITGB8, GJA1, TGFB2, TP53INP1	135	137	16792	4.53961	1	0.561593	32.8425
GOTERM_BP_DIRECT	GO:0007050~cell cycle arrest	5	0.0205736	0.0264561	TGFBR1, IRF1, SKIL, TGFB2, TP53INP1	135	141	16792	4.41082	1	0.586069	35.4076
GOTERM_BP_DIRECT	GO:0043410~positive regulation of MAPK cascade	4	0.0164589	0.0269958	FLT1, FAS, IL6R, KIT	135	81	16792	6.14248	1	0.584301	35.9889
GOTERM_BP_DIRECT	GO:0007399~nervous system development	7	0.028803	0.027658	ROBO1, TENM1, LSAMP, VEGFA, DLG4, NRG1, SIM2	135	287	16792	3.03379	1	0.584257	36.6954
GOTERM_BP_DIRECT	GO:0050731~positive regulation of peptidyl-tyrosine phosphorylation	4	0.0164589	0.0278617	VEGFA, RELN, IL6R, NRG1	135	82	16792	6.06757	1	0.578186	36.9112
GOTERM_BP_DIRECT	GO:0042981~regulation of apoptotic process	6	0.0246883	0.0280936	RASSF3, ANP32E, FAS, SKIL, HIP1, TP53INP1	135	213	16792	3.50381	1	0.572685	37.156
GOTERM_BP_DIRECT	GO:0006919~activation of cysteine-type endopeptidase activity involved in apoptotic process	4	0.0164589	0.0287423	ROBO1, FAS, BCL2L11, HIP1	135	83	16792	5.99447	1	0.572747	37.8363
GOTERM_BP_DIRECT	GO:0048070~regulation of developmental pigmentation	2	0.00822944	0.0315427	KIT, BCL2L11	135	4	16792	62.1926	1	0.599005	40.6945
GOTERM_BP_DIRECT	GO:0086091~regulation of heart rate by cardiac conduction	3	0.0123442	0.0316762	CAMK2D, SCN4B, KCNJ2	135	35	16792	10.6616	1	0.592529	40.8276
GOTERM_BP_DIRECT	GO:0038128~ERBB2 signaling pathway	3	0.0123442	0.0368529	EGFR, NRG1, PIK3R1	135	38	16792	9.81988	1	0.641207	45.7787
GOTERM_BP_DIRECT	GO:0042517~positive regulation of tyrosine phosphorylation of Stat3 protein	3	0.0123442	0.0368529	VEGFA, IL6R, KIT	135	38	16792	9.81988	1	0.641207	45.7787
GOTERM_BP_DIRECT	GO:0009790~embryo development	3	0.0123442	0.0368529	NRG1, STOX2, TGFB2	135	38	16792	9.81988	1	0.641207	45.7787
GOTERM_BP_DIRECT	GO:0006915~apoptotic process	10	0.0411472	0.037985	TGFBR1, SULF1, IRF1, GJA1, NR3C1, FAS, PTEN, BCL2L11, HIP1, TP53INP1	135	567	16792	2.19374	1	0.644807	46.8083
GOTERM_BP_DIRECT	GO:1905007~positive regulation of epithelial to mesenchymal transition involved in endocardial cushion formation	2	0.00822944	0.0392728	TGFBR1, TGFB2	135	5	16792	49.7541	1	0.649727	47.9572
GOTERM_BP_DIRECT	GO:0008584~male gonad development	4	0.0164589	0.0393903	TGFBR1, KIT, BCL2L11, TGFB2	135	94	16792	5.29299	1	0.643422	48.0609
GOTERM_BP_DIRECT	GO:0030336~negative regulation of cell migration	4	0.0164589	0.0404448	ROBO1, SULF1, PTEN, TP53INP1	135	95	16792	5.23727	1	0.646054	48.9826
GOTERM_BP_DIRECT	GO:0030326~embryonic limb morphogenesis	3	0.0123442	0.0404717	FRAS1, HOXD10, TGFB2	135	40	16792	9.32889	1	0.639163	49.0058
GOTERM_BP_DIRECT	GO:0071456~cellular response to hypoxia	4	0.0164589	0.0415135	VEGFA, RORA, PTEN, PPARGC1A	135	96	16792	5.18272	1	0.641704	49.901
GOTERM_BP_DIRECT	GO:0007169~transmembrane receptor protein tyrosine kinase signaling pathway	4	0.0164589	0.0415135	EGFR, FLT1, KIT, NRG1	135	96	16792	5.18272	1	0.641704	49.901
GOTERM_BP_DIRECT	GO:0007165~signal transduction	16	0.0658355	0.0438185	EGFR, IRS2, TGFBR1, NEDD9, GJA1, PDE4D, NR3C1, KIT, RASSF3, SALL3, SMOC2, TENM1, DLG4, MCC, FAS, PIK3R1	135	1161	16792	1.71418	1	0.655132	51.8291
GOTERM_BP_DIRECT	GO:0097191~extrinsic apoptotic signaling pathway	3	0.0123442	0.0442187	FAS, IL6R, TGFB2	135	42	16792	8.88466	1	0.651809	52.1568
GOTERM_BP_DIRECT	GO:0010649~regulation of cell communication by electrical coupling	2	0.00822944	0.0469417	CAMK2D, ASPH	135	6	16792	41.4617	1	0.667637	54.3309
GOTERM_BP_DIRECT	GO:0038084~vascular endothelial growth factor signaling pathway	2	0.00822944	0.0469417	FLT1, VEGFA	135	6	16792	41.4617	1	0.667637	54.3309
GOTERM_BP_DIRECT	GO:0023014~signal transduction by protein phosphorylation	3	0.0123442	0.0480891	MAP4K4, TGFBR1, TGFB2	135	44	16792	8.48081	1	0.670216	55.219
GOTERM_BP_DIRECT	GO:0046777~protein autophosphorylation	5	0.0205736	0.049054	EGFR, FLT1, CAMK2D, KIT, SIK1	135	172	16792	3.61585	1	0.671306	55.9532
GOTERM_BP_DIRECT	GO:0070374~positive regulation of ERK1 and ERK2 cascade	5	0.0205736	0.0516675	EGFR, GCNT2, VEGFA, CAMK2D, PTEN	135	175	16792	3.55386	1	0.684506	57.8856
GOTERM_BP_DIRECT	GO:0048666~neuron development	3	0.0123442	0.052078	EPHA5, TENM1, TGFB2	135	46	16792	8.11208	1	0.681345	58.1818
GOTERM_BP_DIRECT	GO:0006366~transcription from RNA polymerase II promoter	9	0.0370325	0.0533195	SALL3, HLF, ELF4, TRPS1, HEYL, IRF1, CDK9, NR3C1, ETV5	135	513	16792	2.1822	1	0.684142	59.0657
GOTERM_BP_DIRECT	GO:0007435~salivary gland morphogenesis	2	0.00822944	0.0545498	EGFR, TGFB2	135	7	16792	35.5386	1	0.68676	59.9243
GOTERM_BP_DIRECT	GO:0051057~positive regulation of small GTPase mediated signal transduction	2	0.00822944	0.0545498	SOS2, RELN	135	7	16792	35.5386	1	0.68676	59.9243
GOTERM_BP_DIRECT	GO:0060982~coronary artery morphogenesis	2	0.00822944	0.0545498	TGFBR1, VEGFA	135	7	16792	35.5386	1	0.68676	59.9243
GOTERM_BP_DIRECT	GO:1901844~regulation of cell communication by electrical coupling involved in cardiac conduction	2	0.00822944	0.0620976	CAMK2D, PDE4D	135	8	16792	31.0963	1	0.728988	64.833
GOTERM_BP_DIRECT	GO:0035137~hindlimb morphogenesis	2	0.00822944	0.0620976	SALL3, HOXD10	135	8	16792	31.0963	1	0.728988	64.833
GOTERM_BP_DIRECT	GO:0051963~regulation of synapse assembly	2	0.00822944	0.0620976	PPP1R9A, PDLIM5	135	8	16792	31.0963	1	0.728988	64.833
GOTERM_BP_DIRECT	GO:0061049~cell growth involved in cardiac muscle cell development	2	0.00822944	0.0620976	PDLIM5, CAMK2D	135	8	16792	31.0963	1	0.728988	64.833
GOTERM_BP_DIRECT	GO:0035148~tube formation	2	0.00822944	0.0620976	VEGFA, BCL2L11	135	8	16792	31.0963	1	0.728988	64.833
GOTERM_BP_DIRECT	GO:0006357~regulation of transcription from RNA polymerase II promoter	8	0.0329177	0.0634289	PKNOX2, FOXQ1, VEGFA, CAMK2D, LPIN1, TRERF1, TCF7L1, SIM2	135	441	16792	2.25642	1	0.731168	65.6379
GOTERM_BP_DIRECT	GO:0006461~protein complex assembly	4	0.0164589	0.0657835	OCLN, DLG4, FAS, PPARGC1A	135	116	16792	4.28914	1	0.738977	67.0194
GOTERM_BP_DIRECT	GO:0032464~positive regulation of protein homooligomerization	2	0.00822944	0.0695857	FAS, BCL2L11	135	9	16792	27.6412	1	0.753913	69.1406
GOTERM_BP_DIRECT	GO:0008354~germ cell migration	2	0.00822944	0.0695857	TGFBR1, KIT	135	9	16792	27.6412	1	0.753913	69.1406
GOTERM_BP_DIRECT	GO:0097120~receptor localization to synapse	2	0.00822944	0.0695857	DLG4, RELN	135	9	16792	27.6412	1	0.753913	69.1406
GOTERM_BP_DIRECT	GO:0010863~positive regulation of phospholipase C activity	2	0.00822944	0.0695857	FLT1, KIT	135	9	16792	27.6412	1	0.753913	69.1406
GOTERM_BP_DIRECT	GO:0048103~somatic stem cell division	2	0.00822944	0.0695857	KIT, TGFB2	135	9	16792	27.6412	1	0.753913	69.1406
GOTERM_BP_DIRECT	GO:2000188~regulation of cholesterol homeostasis	2	0.00822944	0.0695857	LDLR, RORA	135	9	16792	27.6412	1	0.753913	69.1406
GOTERM_BP_DIRECT	GO:0030198~extracellular matrix organization	5	0.0205736	0.0720433	SMOC2, CRISPLD2, ITGB8, COL13A1, COL4A6	135	196	16792	3.17309	1	0.76112	70.4429
GOTERM_BP_DIRECT	GO:0006468~protein phosphorylation	8	0.0329177	0.0729722	CDK19, MAP4K4, TGFBR1, CAMK2D, CDK9, SIK1, PIK3R1, TGFB2	135	456	16792	2.1822	1	0.760604	70.9215
GOTERM_BP_DIRECT	GO:0008283~cell proliferation	7	0.028803	0.0731495	EGFR, IRS2, ENTPD5, CDK9, NRG1, PTEN, TGFB2	135	366	16792	2.37895	1	0.756459	71.012
GOTERM_BP_DIRECT	GO:0050680~negative regulation of epithelial cell proliferation	3	0.0123442	0.0736402	MCC, PTEN, TGFB2	135	56	16792	6.66349	1	0.753896	71.2612
GOTERM_BP_DIRECT	GO:0051272~positive regulation of cellular component movement	2	0.00822944	0.0770143	TGFBR1, VEGFA	135	10	16792	24.877	1	0.765005	72.9208
GOTERM_BP_DIRECT	GO:0060044~negative regulation of cardiac muscle cell proliferation	2	0.00822944	0.0770143	GJA1, PTEN	135	10	16792	24.877	1	0.765005	72.9208
GOTERM_BP_DIRECT	GO:0003184~pulmonary valve morphogenesis	2	0.00822944	0.0770143	HEYL, TGFB2	135	10	16792	24.877	1	0.765005	72.9208
GOTERM_BP_DIRECT	GO:0035136~forelimb morphogenesis	2	0.00822944	0.0770143	SALL3, HOXD10	135	10	16792	24.877	1	0.765005	72.9208
GOTERM_BP_DIRECT	GO:0061001~regulation of dendritic spine morphogenesis	2	0.00822944	0.0770143	PPP1R9A, PDLIM5	135	10	16792	24.877	1	0.765005	72.9208
GOTERM_BP_DIRECT	GO:0043586~tongue development	2	0.00822944	0.0770143	EGFR, BNC2	135	10	16792	24.877	1	0.765005	72.9208
GOTERM_BP_DIRECT	GO:0003181~atrioventricular valve morphogenesis	2	0.00822944	0.0843841	HEYL, TGFB2	135	11	16792	22.6155	1	0.792149	76.2381
GOTERM_BP_DIRECT	GO:0071372~cellular response to follicle-stimulating hormone stimulus	2	0.00822944	0.0843841	EPHA5, PPARGC1A	135	11	16792	22.6155	1	0.792149	76.2381
GOTERM_BP_DIRECT	GO:0007416~synapse assembly	3	0.0123442	0.0853182	NRG1, PTEN, FARP1	135	61	16792	6.1173	1	0.791403	76.6302
GOTERM_BP_DIRECT	GO:0000902~cell morphogenesis	3	0.0123442	0.0877175	TENM1, NRG1, TGFB2	135	62	16792	6.01864	1	0.796423	77.6097
GOTERM_BP_DIRECT	GO:0097067~cellular response to thyroid hormone stimulus	2	0.00822944	0.0916955	KIT, PPARGC1A	135	12	16792	20.7309	1	0.807035	79.1492
GOTERM_BP_DIRECT	GO:0086004~regulation of cardiac muscle cell contraction	2	0.00822944	0.0916955	PDE4D, KCNJ2	135	12	16792	20.7309	1	0.807035	79.1492
GOTERM_BP_DIRECT	GO:0030007~cellular potassium ion homeostasis	2	0.00822944	0.0916955	CAMK2D, KCNJ2	135	12	16792	20.7309	1	0.807035	79.1492
GOTERM_BP_DIRECT	GO:0035641~locomotory exploration behavior	2	0.00822944	0.0916955	LSAMP, DLG4	135	12	16792	20.7309	1	0.807035	79.1492
GOTERM_BP_DIRECT	GO:0035413~positive regulation of catenin import into nucleus	2	0.00822944	0.0916955	EGFR, BAMBI	135	12	16792	20.7309	1	0.807035	79.1492
GOTERM_BP_DIRECT	GO:0055119~relaxation of cardiac muscle	2	0.00822944	0.0916955	CAMK2D, KCNJ2	135	12	16792	20.7309	1	0.807035	79.1492
GOTERM_BP_DIRECT	GO:0060997~dendritic spine morphogenesis	2	0.00822944	0.0916955	DLG4, PTEN	135	12	16792	20.7309	1	0.807035	79.1492
GOTERM_BP_DIRECT	GO:0050821~protein stabilization	4	0.0164589	0.0951591	PTEN, PPARGC1A, PIK3R1, HIP1	135	136	16792	3.65839	1	0.815128	80.4082
GOTERM_BP_DIRECT	GO:0045780~positive regulation of bone resorption	2	0.00822944	0.098949	EGFR, TFRC	135	13	16792	19.1362	1	0.823795	81.7038
GOTERM_BP_DIRECT	GO:0060389~pathway-restricted SMAD protein phosphorylation	2	0.00822944	0.098949	TGFBR1, TGFB2	135	13	16792	19.1362	1	0.823795	81.7038
GOTERM_BP_DIRECT	GO:0015693~magnesium ion transport	2	0.00822944	0.098949	NIPA1, KCNJ2	135	13	16792	19.1362	1	0.823795	81.7038
GOTERM_BP_DIRECT	GO:0048268~clathrin coat assembly	2	0.00822944	0.098949	NSG1, HIP1	135	13	16792	19.1362	1	0.823795	81.7038
GOTERM_BP_DIRECT	GO:0086012~membrane depolarization during cardiac muscle cell action potential	2	0.00822944	0.098949	SCN4B, KCNJ2	135	13	16792	19.1362	1	0.823795	81.7038
GOTERM_BP_DIRECT	GO:0035418~protein localization to synapse	2	0.00822944	0.098949	DLG4, RELN	135	13	16792	19.1362	1	0.823795	81.7038

## Sheet: CC
Category	Term	Count	GeneRatio	PValue	Genes	List Total	Pop Hits	Pop Total	Fold Enrichment	Bonferroni	Benjamini	FDR
GOTERM_CC_DIRECT	GO:0005886~plasma membrane	50	0.205736	0.000310733	OCLN, LDLR, GJA1, PTEN, FRMD6, ROBO1, DLG4, GUCY1A3, SV2B, ASPH, MCOLN2, FAS, EGFR, IRS2, PARM1, MYO6, RAB39B, IL6R, BASP1, LSAMP, RELN, MCC, ADD3, FRAS1, CPM, KIT, CYTH3, KCNJ2, CHD9, ITGB8, CAMK2D, ETV5, PIK3R1, CNKSR2, FLT1, COL13A1, TGFBR1, OSBPL6, NTN4, NIPA1, RASSF3, EPHA5, TFRC, SEMA6D, TENM1, BNC2, SLC6A6, SULF1, SCN4B, BAMBI	138	4121	18224	1.60226	0.0666673	0.0666673	0.395399
GOTERM_CC_DIRECT	GO:0000139~Golgi membrane	14	0.0576061	0.000520757	EGFR, MGAT4A, PARM1, GCNT2, GJA1, CYTH3, ERGIC1, RND3, GNPTAB, CHST11, NSG1, B3GNT2, GOSR1, GCNT1	138	591	18224	3.12828	0.109203	0.0561793	0.661831
GOTERM_CC_DIRECT	GO:0016020~membrane	31	0.127556	0.000811548	GCNT2, LDLR, PDLIM5, RPL15, EDEM3, KIT, CHST11, CAMK2D, SV2B, FAS, ASPH, NRG1, ACSL4, GCNT1, PIK3R1, HIP1, EGFR, CNKSR2, MGAT4A, MYO6, LPGAT1, TGFBR1, CDK9, PDE4D, NIPA1, IL6R, ERGIC1, TFRC, VEGFA, GOSR1, ADD3	138	2200	18224	1.86082	0.164928	0.0583098	1.02964
GOTERM_CC_DIRECT	GO:0016605~PML body	6	0.0246883	0.000865822	ELF4, CDK9, SKIL, PTEN, PPARGC1A, TP53INP1	138	98	18224	8.08518	0.174937	0.0469367	1.09815
GOTERM_CC_DIRECT	GO:0005634~nucleus	57	0.234539	0.00338017	CDK19, HLF, ELF4, RPL15, RORA, ZNF10, PTEN, HOXD10, NSG1, PSIP1, RBMS2, QKI, FAS, NRG1, SIK1, EGFR, PARM1, MYO6, PALD1, ANP32E, MBNL2, BASP1, PPARGC1A, TRERF1, LPIN1, DCUN1D1, PPM1E, MLLT10, RRM2, ZNF711, MCC, YPEL1, NEDD9, NR3C1, TCF7L1, CHD9, FOXQ1, SPATA2, CAMK2D, SKIL, ETV5, PIK3R1, SIM2, USP31, HIP1, PTPN14, AFF3, PHF12, PKNOX2, SALL3, TENM1, TRPS1, BNC2, HEYL, IRF1, FBXO32, TP53INP1	138	5415	18224	1.39008	0.528421	0.139579	4.22449
GOTERM_CC_DIRECT	GO:0014704~intercalated disc	4	0.0164589	0.00468297	CAMK2D, GJA1, SCN4B, KCNJ2	138	45	18224	11.7385	0.647273	0.159432	5.80833
GOTERM_CC_DIRECT	GO:0045211~postsynaptic membrane	7	0.028803	0.00525652	CNKSR2, COL13A1, PDLIM5, DLG4, NSG1, PSD3, PTEN	138	211	18224	4.38107	0.689641	0.153924	6.49792
GOTERM_CC_DIRECT	GO:0016324~apical plasma membrane	8	0.0329177	0.00650312	EGFR, OCLN, GJA1, PDE4D, IL6R, AMOTL1, NRG1, PTEN	138	291	18224	3.63046	0.765056	0.165607	7.98072
GOTERM_CC_DIRECT	GO:0005737~cytoplasm	54	0.222195	0.00706741	PDLIM5, AMOTL1, PTEN, FRMD6, ROBO1, NSG1, DLG4, RBMS3, QKI, FAS, NRG1, SIK1, EGFR, PARM1, MYO6, LPGAT1, CDK9, MBNL2, BASP1, LPIN1, FARP1, MAP4K4, MLLT10, RRM2, VEGFA, RELN, MCC, ADD3, NEDD9, NR3C1, EPB41L4B, CHD9, SPATA2, CAMK2D, SKIL, ACSL4, PIK3R1, HIP1, CNKSR2, ARHGEF38, PTPN14, AFF3, C5ORF30, RASSF3, PKNOX2, PPP1R9A, SEMA6D, TENM1, BNC2, HEYL, IRF1, FBXO32, BAMBI, TP53INP1	138	5222	18224	1.36559	0.792896	0.1605	8.64478
GOTERM_CC_DIRECT	GO:0005768~endosome	7	0.028803	0.00713301	EGFR, FLT1, TFRC, LDLR, TGFBR1, NSG1, TGFB2	138	225	18224	4.10847	0.795912	0.146936	8.72169
GOTERM_CC_DIRECT	GO:0009986~cell surface	11	0.0452619	0.0078774	EGFR, CPM, TFRC, LDLR, ITGB8, ROBO1, TGFBR1, VEGFA, SULF1, FAS, IL6R	138	542	18224	2.68014	0.827215	0.147524	9.59026
GOTERM_CC_DIRECT	GO:0043005~neuron projection	7	0.028803	0.00909253	CNKSR2, RAB39B, TENM1, PDLIM5, SV2B, FAS, PTEN	138	237	18224	3.90045	0.868372	0.155475	10.9917
GOTERM_CC_DIRECT	GO:0043025~neuronal cell body	8	0.0329177	0.00983078	EPHA5, CNKSR2, PPP1R9A, CAMK2D, ACSL4, KCNJ2, PPARGC1A, TGFB2	138	315	18224	3.35385	0.888444	0.155246	11.8334
GOTERM_CC_DIRECT	GO:0014069~postsynaptic density	6	0.0246883	0.0127312	CNKSR2, PPP1R9A, PDLIM5, DLG4, PSD3, ADD3	138	184	18224	4.30624	0.941835	0.183865	15.0696
GOTERM_CC_DIRECT	GO:0005794~Golgi apparatus	14	0.0576061	0.013209	CNKSR2, PARM1, MYO6, LDLR, RAB39B, ELF4, NEDD9, GJA1, KCNJ2, GNPTAB, TENM1, SULF1, GOSR1, HIP1	138	863	18224	2.14231	0.947762	0.178642	15.5921
GOTERM_CC_DIRECT	GO:0034704~calcium channel complex	3	0.0123442	0.0150307	CAMK2D, PDE4D, ASPH	138	25	18224	15.847	0.965339	0.189524	17.5571
GOTERM_CC_DIRECT	GO:0005856~cytoskeleton	8	0.0329177	0.0221834	FRMD6, TENM1, PTPN14, EPB41L4B, BASP1, ADD3, FARP1, HIP1	138	371	18224	2.84761	0.993127	0.253941	24.872
GOTERM_CC_DIRECT	GO:0009897~external side of plasma membrane	6	0.0246883	0.0224863	EPHA5, TFRC, LDLR, FAS, KIT, NRG1	138	213	18224	3.71994	0.993584	0.244592	25.1681
GOTERM_CC_DIRECT	GO:0031410~cytoplasmic vesicle	6	0.0246883	0.0324648	OCLN, MYO6, TFRC, ANP32E, AMOTL1, TP53INP1	138	235	18224	3.37169	0.999342	0.319971	34.343
GOTERM_CC_DIRECT	GO:0043197~dendritic spine	4	0.0164589	0.0396544	DLG4, KCNJ2, PTEN, FARP1	138	100	18224	5.28232	0.999874	0.361816	40.2982
GOTERM_CC_DIRECT	GO:0005911~cell-cell junction	5	0.0205736	0.0409692	OCLN, COL13A1, KIT, ADD3, PIK3R1	138	172	18224	3.83889	0.999907	0.357395	41.3318
GOTERM_CC_DIRECT	GO:0016323~basolateral plasma membrane	5	0.0205736	0.0470519	EGFR, TFRC, LDLR, DLG4, IL6R	138	180	18224	3.66828	0.999977	0.385121	45.9026
GOTERM_CC_DIRECT	GO:0005923~bicellular tight junction	4	0.0164589	0.0535751	OCLN, TGFBR1, EPB41L4B, AMOTL1	138	113	18224	4.67462	0.999995	0.412268	50.4381
GOTERM_CC_DIRECT	GO:0030054~cell junction	8	0.0329177	0.0584214	PPP1R9A, OCLN, DLG4, PSD3, SV2B, BASP1, AMOTL1, FARP1	138	459	18224	2.30166	0.999998	0.426975	53.5778
GOTERM_CC_DIRECT	GO:0030139~endocytic vesicle	3	0.0123442	0.0623029	EGFR, OCLN, MYO6	138	54	18224	7.33655	0.999999	0.435173	55.9592
GOTERM_CC_DIRECT	GO:0031594~neuromuscular junction	3	0.0123442	0.0643446	PPP1R9A, CAMK2D, NRG1	138	55	18224	7.20316	1	0.433272	57.1661
GOTERM_CC_DIRECT	GO:0005905~clathrin-coated pit	3	0.0123442	0.0643446	MYO6, TFRC, LDLR	138	55	18224	7.20316	1	0.433272	57.1661
GOTERM_CC_DIRECT	GO:0045121~membrane raft	5	0.0205736	0.0700824	EGFR, TGFBR1, SULF1, GJA1, FAS	138	206	18224	3.20529	1	0.449771	60.3966
GOTERM_CC_DIRECT	GO:0043235~receptor complex	4	0.0164589	0.0708275	EGFR, FLT1, LDLR, TGFBR1	138	127	18224	4.15931	1	0.441466	60.7992
GOTERM_CC_DIRECT	GO:0030665~clathrin-coated vesicle membrane	2	0.00822944	0.079675	MYO6, HIP1	138	11	18224	24.0105	1	0.470381	65.3003
GOTERM_CC_DIRECT	GO:0031234~extrinsic component of cytoplasmic side of plasma membrane	3	0.0123442	0.0927635	DLG4, CYTH3, FARP1	138	68	18224	5.82609	1	0.513445	71.0916
GOTERM_CC_DIRECT	GO:0030122~AP-2 adaptor complex	2	0.00822944	0.0934689	EGFR, HIP1	138	13	18224	20.3166	1	0.504772	71.3768
GOTERM_CC_DIRECT	GO:0031965~nuclear membrane	5	0.0205736	0.0944626	EGFR, MYO6, ELF4, OSBPL6, LPIN1	138	229	18224	2.88336	1	0.497614	71.7743
GOTERM_CC_DIRECT	GO:0005654~nucleoplasm	28	0.115212	0.0949615	ELF4, NR3C1, RORA, PTEN, TCF7L1, CHD9, PSIP1, CAMK2D, SKIL, ETV5, SIM2, SMCR8, MYO6, PTPN14, AFF3, CDK9, PHF12, LPIN1, PPARGC1A, MLLT10, RRM2, TRPS1, HEYL, IRF1, FBXO32, MCC, ADD3, TP53INP1	138	2784	18224	1.32817	1	0.488922	71.9719

## Sheet: MF
Category	Term	Count	GeneRatio	PValue	Genes	List Total	Pop Hits	Pop Total	Fold Enrichment	Bonferroni	Benjamini	FDR
GOTERM_MF_DIRECT	GO:0005114~type II transforming growth factor beta receptor binding	3	0.0123442	0.00127958	TGFBR1, BAMBI, TGFB2	135	7	16881	53.5905	0.34125	0.34125	1.71775
GOTERM_MF_DIRECT	GO:0046934~phosphatidylinositol-4,5-bisphosphate 3-kinase activity	5	0.0205736	0.001483	EGFR, IRS2, KIT, NRG1, PIK3R1	135	62	16881	10.0842	0.383573	0.214872	1.98829
GOTERM_MF_DIRECT	GO:0044325~ion channel binding	6	0.0246883	0.00206933	PPP1R9A, DIAPH1, CAMK2D, SCN4B, PDE4D, ASPH	135	113	16881	6.63953	0.490997	0.201564	2.76426
GOTERM_MF_DIRECT	GO:0005088~Ras guanyl-nucleotide exchange factor activity	6	0.0246883	0.00223436	EGFR, IRS2, DLG4, CAMK2D, KIT, NRG1	135	115	16881	6.52406	0.517713	0.166652	2.98163
GOTERM_MF_DIRECT	GO:0043565~sequence-specific DNA binding	12	0.0493766	0.00281506	SALL3, HLF, FOXQ1, ELF4, TRPS1, IRF1, ZNF711, NR3C1, RORA, PPARGC1A, TCF7L1, HOXD10	135	518	16881	2.89678	0.601084	0.167898	3.74295
GOTERM_MF_DIRECT	GO:0000977~RNA polymerase II regulatory region sequence-specific DNA binding	7	0.028803	0.00634224	PKNOX2, HLF, TRPS1, ZNF711, PHF12, RORA, ETV5	135	208	16881	4.20823	0.874337	0.29227	8.2496
GOTERM_MF_DIRECT	GO:0019903~protein phosphatase binding	4	0.0164589	0.0137338	EGFR, IRS2, DLG4, PIK3R1	135	63	16881	7.93933	0.988982	0.474831	17.067
GOTERM_MF_DIRECT	GO:0051015~actin filament binding	5	0.0205736	0.0210316	EGFR, PKNOX2, PPP1R9A, MYO6, HIP1	135	132	16881	4.73653	0.999021	0.579444	24.9969
GOTERM_MF_DIRECT	GO:0043125~ErbB-3 class receptor binding	2	0.00822944	0.0313784	NRG1, PIK3R1	135	4	16881	62.5222	0.999969	0.684882	35.0418
GOTERM_MF_DIRECT	GO:0046982~protein heterodimerization activity	9	0.0370325	0.0321264	EGFR, TENM1, HEYL, VEGFA, SOS2, PIK3R1, HIP1, TGFB2, SIM2	135	465	16881	2.42022	0.999976	0.655104	35.7173
GOTERM_MF_DIRECT	GO:0004714~transmembrane receptor protein tyrosine kinase activity	3	0.0123442	0.036501	EGFR, FLT1, KIT	135	38	16881	9.87193	0.999995	0.667792	39.5396
GOTERM_MF_DIRECT	GO:0008201~heparin binding	5	0.0205736	0.0387212	SMOC2, CRISPLD2, TENM1, COL13A1, VEGFA	135	160	16881	3.90764	0.999997	0.657962	41.398
GOTERM_MF_DIRECT	GO:0032051~clathrin light chain binding	2	0.00822944	0.039069	NSG1, HIP1	135	5	16881	50.0178	0.999998	0.631894	41.6843
GOTERM_MF_DIRECT	GO:0003700~transcription factor activity, sequence-specific DNA binding	14	0.0576061	0.0419234	HLF, NR3C1, RORA, TRERF1, TCF7L1, HOXD10, SALL3, TRPS1, MLLT10, HEYL, ZNF711, IRF1, ETV5, SIM2	135	961	16881	1.82167	0.999999	0.631115	43.9852
GOTERM_MF_DIRECT	GO:0001222~transcription corepressor binding	2	0.00822944	0.054269	PHF12, RORA	135	7	16881	35.727	1	0.702594	53.0019
GOTERM_MF_DIRECT	GO:0097110~scaffold protein binding	3	0.0123442	0.0556589	DLG4, GJA1, PDE4D	135	48	16881	7.81528	1	0.688648	53.928
GOTERM_MF_DIRECT	GO:0005200~structural constituent of cytoskeleton	4	0.0164589	0.0572079	FRMD6, EPB41L4B, ADD3, HIP1	135	110	16881	4.54707	1	0.676862	54.9402
GOTERM_MF_DIRECT	GO:0004702~receptor signaling protein serine/threonine kinase activity	3	0.0123442	0.066293	MAP4K4, TGFBR1, TGFB2	135	53	16881	7.07799	1	0.711277	60.4741
GOTERM_MF_DIRECT	GO:0042802~identical protein binding	11	0.0452619	0.0747822	RASSF3, EGFR, CNKSR2, TFRC, LDLR, ROBO1, VEGFA, FAS, AMOTL1, KCNJ2, PTEN	135	749	16881	1.83643	1	0.736478	65.0696
GOTERM_MF_DIRECT	GO:0001223~transcription coactivator binding	2	0.00822944	0.0766226	CDK9, RORA	135	10	16881	25.0089	1	0.727302	65.9982
GOTERM_MF_DIRECT	GO:0004716~receptor signaling protein tyrosine kinase activity	2	0.00822944	0.0766226	EGFR, KIT	135	10	16881	25.0089	1	0.727302	65.9982
GOTERM_MF_DIRECT	GO:0004722~protein serine/threonine phosphatase activity	3	0.0123442	0.0775392	PPM1E, PPM1L, PTEN	135	58	16881	6.46782	1	0.714334	66.4521
GOTERM_MF_DIRECT	GO:0019904~protein domain specific binding	5	0.0205736	0.0840258	PPP1R9A, IRS2, OCLN, SKIL, BASP1	135	208	16881	3.00588	1	0.727618	69.5075
GOTERM_MF_DIRECT	GO:0005515~protein binding	79	0.325063	0.0885452	OCLN, LDLR, ELF4, PDLIM5, RPL15, GJA1, ZNF10, RORA, AMOTL1, PTEN, TGFB2, FRMD6, ROBO1, NSG1, PSIP1, DLG4, QKI, GUCY1A3, SV2B, FAS, KLHL23, ASPH, SIK1, EGFR, IRS2, SMCR8, MYO6, PALD1, RAB39B, CDK9, PDE4D, BASP1, IL6R, PPARGC1A, ERGIC1, BCL2L11, MAP4K4, RND3, DCUN1D1, PPM1E, RRM2, MLLT10, LSAMP, VEGFA, ZNF711, MCC, DIAPH1, NEDD9, NR3C1, KIT, CYTH3, FAM46C, GNPTAB, SOS2, ENTPD5, CAMK2D, SPATA2, SKIL…	135	8785	16881	1.12447	1	0.731287	71.4816
GOTERM_MF_DIRECT	GO:0004713~protein tyrosine kinase activity	4	0.0164589	0.0895144	EGFR, FLT1, KIT, NRG1	135	133	16881	3.76074	1	0.720236	71.8893
GOTERM_MF_DIRECT	GO:0044212~transcription regulatory region DNA binding	5	0.0205736	0.0897955	SALL3, BASP1, TRERF1, ETV5, TCF7L1	135	213	16881	2.93532	1	0.706794	72.0065
GOTERM_MF_DIRECT	GO:0003682~chromatin binding	7	0.028803	0.0915158	EGFR, TRPS1, PSIP1, CDK9, PHF12, SKIL, HOXD10	135	391	16881	2.23865	1	0.699832	72.7141
GOTERM_MF_DIRECT	GO:0001948~glycoprotein binding	3	0.0123442	0.0941926	EGFR, TFRC, LDLR	135	65	16881	5.77128	1	0.697136	73.7821
GOTERM_MF_DIRECT	GO:0004872~receptor activity	5	0.0205736	0.0945456	LDLR, ITGB8, GUCY1A3, MCC, FAS	135	217	16881	2.88121	1	0.685367	73.9201
